# Supplementary material
Source: MDPI journal article supplement (https://www.mdpi.com/2073-4433/10/1/35)
Supplement: s1 [file s1]

## Supplementary Materials

**Table S1.** Changes of installed units and power generation from coal-fired power plants in Anhui from 2012 to 2017.

| Year                                  |        | 2012   | 2013   | 2014   | 2015   | 2016   | 2017   |
|---------------------------------------|--------|--------|--------|--------|--------|--------|--------|
| Types of units (MW)                   | 50–200 | 7      | 9      | 9      | 10     | 10     | 10     |
|                                       | 300    | 22     | 28     | 28     | 30     | 30     | 30     |
|                                       | 600    | 30     | 34     | 36     | 40     | 42     | 42     |
|                                       | 1000   | 1      | 1      | 1      | 5      | 7      | 8      |
|                                       | Total  | 60     | 72     | 74     | 85     | 89     | 90     |
| Installed capacity (MW)               |        | 28,289 | 33,902 | 34,527 | 41,877 | 45,227 | 46,227 |
| Growth rate of installed capacity (%) |        | -      | 19.8   | 1.8    | 21.3   | 7.9    | 2.2    |
| Power generation (GWh)                |        | 159.01 | 168.44 | 169.98 | 179.09 | 192.12 | 195.02 |
| Growth rate of power generation (%)   |        | -      | 5.9    | 0.9    | 5.4    | 7.3    | 1.5    |

**Table S2.** An overview of CEMS execution standards and test basis in Anhui coal-fired power plants.

| Code      | Title                                                                                                                                                                                              | Year |
|-----------|----------------------------------------------------------------------------------------------------------------------------------------------------------------------------------------------------|------|
| HJ 75     | Specifications for continuous emissions monitoring of SO <sub>2</sub> , NO <sub>x</sub> and particulate matter in the flue gas emitted from stationary sources (on trial)                          | 2017 |
| HJ 76     | Specifications and test procedures for continuous emissions monitoring systems for SO <sub>2</sub> , NO <sub>x</sub> and particulate matter in flue gas emitted from stationary sources (on trial) | 2017 |
| HJ 836    | Stationary source emission-Determination of mass concentration of particulate matter at low concentration- Manual gravimetric method (on trial)                                                    | 2017 |
| DL/T414   | Specification for environmental monitoring of thermal power plants                                                                                                                                 | 2012 |
| HJ/T373   | Technical Specifications of quality assurance and quality control for monitoring of stationary pollution source (on trial)                                                                         | 2007 |
| GB/T16157 | Determination of particulates and sampling methods of gaseous pollutions emitted from exhaust gas of stationary source                                                                             | 1996 |
